# Supplementary material for: In Vivo Evaluation of Withania somnifera–Based Indian Traditional Formulation (Amukkara Choornam), Against Chikungunya Virus–Induced Morbidity and Arthralgia
Source: PubMed Central journal article supplement — J Evid Based Integr Med. 2018 Feb 27;23:2156587218757661. doi: 10.1177/2156587218757661 (PMC5871050; doi:10.1177/2156587218757661), 2018-02-27
Supplement: Supplementary_study_29.pdf [file Supplementary_study_29.pdf]

1 ***In vivo* evaluation of *Withania somnifera* based Indian traditional formulation (*Amukkara***  
2 ***Choornam*), against chikungunya virus induced morbidity and arthralgia**

3

4 **Abstract**

5 Chikungunya viral fever results in extreme morbidity and arthralgia in affected individuals.  
6 Currently, modern medicines providing symptomatic relief for the acute febrile phase and the  
7 chronic arthritic phase are only options available. Traditional Indian medical system, however,  
8 uses specific formulations for treatment of this infection; one such polyherbal formulation used to  
9 treat the post pyretic phase of chikungunya is amukkara choornam. The current study was  
10 undertaken to study the efficacy of amukkara choornam in the treatment of chikungunya in  
11 C57BL/6J mice. The formulation when administered to chikungunya infected mice relieved  
12 morbidity and joint swelling. Analysis of virus clearance in brain and joint tissues upon  
13 formulation treatment revealed a direct correlation of viral load in brain to morbidity during  
14 infection; likewise, joint swelling receded prior to complete viral clearance explaining possible  
15 immune-modulatory effect of amukkara choornam. This study provides insight to the possible  
16 mode of action of amukkara choornam during chikungunya.

17

18 **Keywords:** Polyherbal; Siddha formulations; Chikungunya; post pyretic phase; *In vivo*

19

20

21

22

23

24

25

26

27

28

29

30 **Supplementary information**

31 ***In vitro* antiviral activity assays**

32 **Material and methods**

33 **Development of Mice model for evaluating amukkara choornam during chikungunya virus**  
34 **infection**

35 8 weeks old C57BL/6J mice were used for this study. Virus was prepared and was checked using  
36 plaque assay using previously standardized protocols (Lee et al., 2013).  $1 \times 10^6$  pfu of virus was  
37 injected in the hind left footpad of eight mice. Mice were observed for 15 days and 2 mice each  
38 were sacrificed at Day 3, Day 5, Day 7 and Day 15. A total of 14 organs were recovered from  
39 their body namely Joint, Brain, Muscle, Liver, Spleen, Skin, Intestine, Bone marrow, Serum,  
40 Heart, Thymus, Lungs and Kidney. Organs from both animals were pooled and viral nucleic acid  
41 (VNA) was extracted from the stored samples using High Pure Viral Nucleic Acid kit (Roche,  
42 Germany Cat No. 11858874001). Estimation of Viral copy number in the organs was done using  
43 QuantiTect® Reverse Transcription kit (Qiagen, Germany, Cat No.205310), as per the  
44 manufacturer's instructions. Using laboratory generated reference strain in serial dilution of 100ng  
45 to 1pg, exact copy number of CHIKV from viral RNA isolated from patient sera.

46

47 **Results**

48 **Development of Mice model for chikungunya virus infection**

49 C57BL/6J mouse has been widely used as a promising chikungunya model (Morrison et al., 2011;  
50 Yeo & Chu, 2013) for testing potential CHIKV inhibitors (Kuo et al., 2016; Varghese et al., 2016).  
51 This mouse is capable of hosting replication of CHIKV administered in the footpad of the hind  
52 limbs and succumbs to it at high challenge doses. For the establishment of mice model for  
53 chikungunya virus infection  $1 \times 10^6$  virus particles were injected in the footpad of 8 mice and 3  
54 mice were mock infected with PBS alone and used as a control group. Mice were observed for the  
55 difference in their morbidity conditions based on Morton & Griffiths (1985) scale (Morton &  
56 Griffiths, 1985) and two mice were sacrificed after Day 3, Day 5 Day 7 and Day 10 respectively.  
57 It was observed that morbidity started to increase after Day 2 post infection and continued  
58 deterioration occurred till Day 7 thereafter mortality was observed at Day 8 and Day 10 in the  
59 remaining mice, Mice were sacrificed and Organ wise viral load was detected for every mouse  
60 (Figure 2S).

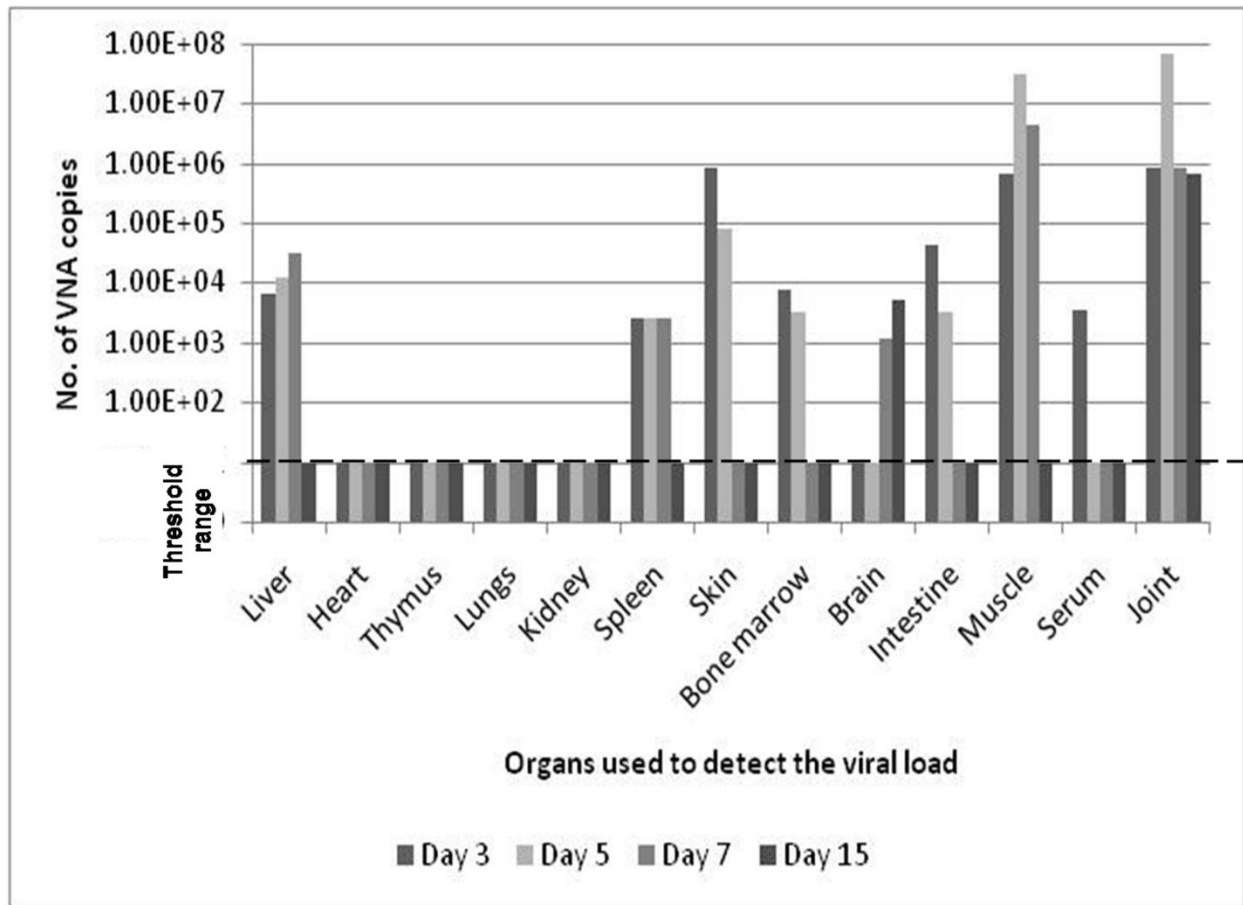

61  
 62 **Figure 2S:** Organ wise viral load detection in mice at Day 3, Day 5, Day 7 and Day 15 post infection for establishment  
 63 of animal model upon chikungunya viral infection

64  
 65 We investigated the kinetic of virus replication in tissues of 8-weeks-old mice at D3 and D5 pi and  
 66 at the onset of symptoms (D7 pi) and at D 15 (or before, depending on the time of death) pi.  
 67 Infectious virus was detected at low level at D3 pi in serum and at D5 and D7 pi in liver (Figure  
 68 2S). Strikingly, at all-time points analyzed, infectious CHIKV was detected very abundantly in  
 69 muscle, joint and skin and to a lower extent in the brain, whereas in D15 virus was cleared from  
 70 most organs but was found in brain. It was found that Viral load at Day 3 was highest in the joints  
 71 followed by skin, muscle, intestine, bone marrow, liver, serum and spleen wherein viral copy  
 72 number was  $9.1 \times 10^5$ ,  $8.2 \times 10^5$ ,  $7.8 \times 10^5$ ,  $4.5 \times 10^4$ ,  $8.2 \times 10^3$ ,  $7.3 \times 10^3$ ,  $4.1 \times 10^3$  and  $3.2 \times 10^3$   
 73 respectively. Viral load increased till Day 5 post infection in all the other organs except for serum  
 74 and skin, in these organs viral load decreased 5 days post infection was number of VNA copies  
 75 decreased to  $7.2 \times 10^2$  and  $8.4 \times 10^4$  respectively. At Day 7 post infection viral load decreased  
 76 substantially in all organs except for brain where the viral copy number was detected to be  $1.8 \times 10^3$ .

77 Mortality of mice was observed at Day 8 and Day 10 post infection when organ wise viral load  
78 was detected in these mice it was observed that in all organs was below detectable range except  
79 joint and brain where detected number of VNA was  $7.2 \times 10^5$  and  $5.4 \times 10^3$  respectively.

80

## 81 **References**

82 Kuo, S.-C., Wang, Y.-M., Ho, Y.-J., Chang, T.-Y., Lai, Z.-Z., Tsui, P.-Y., . . . Lin, C.-C. (2016). Suramin treatment reduces  
83 chikungunya pathogenesis in mice. *Antiviral research*, *134*, 89-96.

84 Lee, R. C., Hapuarachchi, H. C., Chen, K. C., Hussain, K. M., Chen, H., Low, S. L., . . . Chu, J. J. (2013). Mosquito  
85 cellular factors and functions in mediating the infectious entry of chikungunya virus. *PLoS Negl Trop Dis*,  
86 *7*(2), e2050. doi:10.1371/journal.pntd.0002050

87 Morrison, T. E., Oko, L., Montgomery, S. A., Whitmore, A. C., Lotstein, A. R., Gunn, B. M., . . . Heise, M. T. (2011). A  
88 Mouse Model of Chikungunya Virus–Induced Musculoskeletal Inflammatory Disease: Evidence of Arthritis,  
89 Tenosynovitis, Myositis, and Persistence. *The American journal of pathology*, *178*(1), 32-40.

90 Morton, D., & Griffiths, P. (1985). *Guidelines on the recognition of pain, distress and discomfort in experimental*  
91 *animals and an hypothesis for assessment*: publisher not identified.

92 Varghese, F. S., Thaa, B., Amrun, S. N., Simarmata, D., Rausalu, K., Nyman, T. A., . . . Ahola, T. (2016). The Antiviral  
93 Alkaloid Berberine Reduces Chikungunya Virus-Induced Mitogen-Activated Protein Kinase Signaling.  
94 *Journal of Virology*, *90*(21), 9743-9757.

95 Yeo, L. S., & Chu, J. J. H. (2013). Recent developments and challenges in mouse models of Chikungunya virus  
96 infection. *Future Virology*, *8*(5), 423-426.

97

98
