# Supplementary material for: In Vivo Evaluation of Withania somnifera–Based Indian Traditional Formulation (Amukkara Choornam), Against Chikungunya Virus–Induced Morbidity and Arthralgia
Source: PubMed Central journal article supplement — J Evid Based Integr Med. 2018 Feb 27;23:2156587218757661. doi: 10.1177/2156587218757661 (PMC5871050; doi:10.1177/2156587218757661), 2018-02-27
Supplement: Supplementary_tables.pdf [file Supplementary_tables.pdf]

**Supplementary table 1: Natural Ingredients present in amukkara choornam**

| <b>Medicine</b>              |                                                   | <b>Ingredients</b>                 |                                           |
|------------------------------|---------------------------------------------------|------------------------------------|-------------------------------------------|
|                              | <b>Reference</b>                                  | <b>Common name<br/>Ingredients</b> | <b>Scientific name of<br/>Ingredients</b> |
| <b>AMUKKARA<br/>CHOORNAM</b> | Agaththiyar<br>Vaidhya Raththina<br>Churukkam-360 | Indian ginseng                     | <i>Withania somnifera</i>                 |
|                              |                                                   | Dry ginger                         | <i>Zingiber officinale</i>                |
|                              |                                                   | Black Pepper                       | <i>Piper nigrum</i>                       |
|                              |                                                   | Long Pepper                        | <i>Piper longum</i>                       |
|                              |                                                   | Cardamom                           | <i>Elettaria cardamomum</i>               |
|                              |                                                   | Cinnamon                           | <i>Cinnamomum verum</i>                   |
|                              |                                                   | Clove                              | <i>Syzygium aromaticum</i>                |

**Supplementary table 2a: Physiochemical studies of amukkara choornam**

| <b>S. No.</b> | <b>Parameter</b>           | <b>I</b> | <b>II</b> | <b>Mean</b> |
|---------------|----------------------------|----------|-----------|-------------|
| 1             | Loss on Drying at 70°C     | 9.31g    | 9.26g     | 9.28g       |
| 2             | Total Ash                  | 3.76g    | 3.83g     | 3.8g        |
| 3             | Water soluble Ash          | 1.8g     | 1.6g      | 1.7g        |
| 4             | Acid insoluble Ash         | 0.82g    | 0.98g     | 0.9g        |
| 5             | Water soluble Extractive   | 9.7g     | 8.3g      | 9.1g        |
| 6             | Alcohol Soluble Extractive | 11.6g    | 12.6g     | 12.1g       |
| 7             | Ph Value                   | 7.2      | 7         | 7.1         |

**Supplementary table 2b: Preliminary phytochemical Analysis of amukkara choornam**

| <b>Parameter</b>                  | <b>Characteristics of Amukkara choornam</b> |
|-----------------------------------|---------------------------------------------|
| <b>General Information</b>        |                                             |
| Fluorescence analysis (Day light) | Off white                                   |
| fluorescence analysis (UV light)  | Off white                                   |
| Odour                             | Aromatic (herbal)                           |
| Taste                             | Slight bitter                               |
| Texture                           | Smooth powder                               |
| <b>Solubility</b>                 |                                             |
| Water                             | Partially                                   |
| Chloroform                        | Partially                                   |
| Methanol                          | Partially                                   |
| Ethanol                           | Partially                                   |
| <b>Phytochemical</b>              |                                             |
| Phenol                            | -                                           |
| Terpenoids                        | +                                           |
| Flavonoids                        | -                                           |
| Alkaloids                         | +                                           |
| Carbohydrates                     | +                                           |
| Reducing sugar                    | +                                           |
| Glycosides                        | -                                           |
| Quinines                          | -                                           |
| Proteins                          | -                                           |
| Tannins                           | +                                           |
| Anthraquinones                    | -                                           |
| Steroids                          | +                                           |
| Saponin                           | -                                           |

**Supplementary table 3: group wise descriptive analysis data for the parameters used to detect the efficacy of amukkara choornam in *invivo* studies**

| S. No.   |                                  |                                | G1<br>(Control) | G2<br>(Challenged) | G3<br>(Mock infected with AMC treatment) | G4<br>(Challenged with AMC treatment) |
|----------|----------------------------------|--------------------------------|-----------------|--------------------|------------------------------------------|---------------------------------------|
|          |                                  |                                | 16              | 16                 | 16                                       | 16                                    |
|          | <b>No. of values</b>             |                                | <b>16</b>       | <b>16</b>          | <b>16</b>                                | <b>16</b>                             |
| <b>1</b> | <b>Weight of male</b>            | <b>Mean</b>                    | 25.34           | 23.33              | 25.21                                    | 24.44                                 |
|          |                                  | <b>Std. Deviation</b>          | 0.99            | 2.33               | 0.9                                      | 1.04                                  |
|          |                                  | <b>Std. Error of Mean</b>      | 0.25            | 0.83               | 0.22                                     | 0.26                                  |
|          |                                  | <b>P value (two tailed)WSR</b> | < 0.0001        | 0.0078             | < 0.0001                                 | < 0.0001                              |
| <b>2</b> | <b>Weight of female</b>          | <b>Mean</b>                    | 20.52           | 17.96              | 20.27                                    | 20.27                                 |
|          |                                  | <b>Std. Deviation</b>          | 1.51            | 2                  | 1.27                                     | 1.25                                  |
|          |                                  | <b>Std. Error of Mean</b>      | 0.38            | 0.58               | 0.31                                     | 0.31                                  |
|          |                                  | <b>P value (two tailed)WSR</b> | < 0.0001        | 0.0005             | < 0.0001                                 | < 0.0001                              |
| <b>3</b> | <b>Temperature of male</b>       | <b>Mean</b>                    | 27.98           | 32.45              | 27.92                                    | 29.72                                 |
|          |                                  | <b>Std. Deviation</b>          | 1.2             | 1.92               | 1.16                                     | 2.32                                  |
|          |                                  | <b>Std. Error of Mean</b>      | 0.3             | 0.68               | 0.29                                     | 0.58                                  |
|          |                                  | <b>P value (two tailed)WSR</b> | < 0.0001        | 0.0078             | < 0.0001                                 | 0.0051                                |
| <b>4</b> | <b>Temperature of female</b>     | <b>Mean</b>                    | 28.42           | 30.57              | 28.1                                     | 28.57                                 |
|          |                                  | <b>Std. Deviation</b>          | 1.89            | 1.58               | 1.4                                      | 1.31                                  |
|          |                                  | <b>Std. Error of Mean</b>      | 0.47            | 0.45               | 0.35                                     | 0.38                                  |
|          |                                  | <b>P value (two tailed)WSR</b> | < 0.0001        | 0.0005             | < 0.0001                                 | < 0.0001                              |
| <b>5</b> | <b>Size of right limb male</b>   | <b>Mean</b>                    | 2.26            | 3.1                | 2.26                                     | 2.31                                  |
|          |                                  | <b>Std. Deviation</b>          | 0.04            | 0.82               | 0.04                                     | 0.08                                  |
|          |                                  | <b>Std. Error of Mean</b>      | 0.01            | 0.3                | 0.01                                     | 0.02                                  |
|          |                                  | <b>P value (two tailed)WSR</b> | < 0.0001        | 0.0078             | < 0.0001                                 | < 0.0001                              |
| <b>6</b> | <b>Size of right limb female</b> | <b>Mean</b>                    | 2.16            | 3.88               | 2.26                                     | 1.98                                  |
|          |                                  | <b>Std. Deviation</b>          | 0.05            | 1.61               | 0.04                                     | 0.09                                  |
|          |                                  | <b>Std. Error of Mean</b>      | 0.02            | 0.46               | 0.01                                     | 0.02                                  |
|          |                                  | <b>P value (two tailed)WSR</b> | 0.0001          | 0.0005             | < 0.0001                                 | < 0.0001                              |
| <b>7</b> | <b>Size of left limb male</b>    | <b>Mean</b>                    | 2.47            | 2.94               | 2.35                                     | 2.47                                  |
|          |                                  | <b>Std. Deviation</b>          | 0.17            | 0.34               | 0.06                                     | 0.17                                  |
|          |                                  | <b>Std. Error of Mean</b>      | 0.04            | 0.11               | 0.01                                     | 0.04                                  |
|          |                                  | <b>P value (two tailed)WSR</b> | < 0.0001        | 0.0078             | < 0.0001                                 | < 0.0001                              |
| <b>8</b> | <b>Size of left limb female</b>  | <b>Mean</b>                    | 1.98            | 3.87               | 1.98                                     | 1.98                                  |
|          |                                  | <b>Std. Deviation</b>          | 0.086           | 1.61               | 0.09                                     | 0.09                                  |
|          |                                  | <b>Std. Error of Mean</b>      | 0.02            | 0.46               | 0.02                                     | 0.02                                  |
|          |                                  | <b>P value (two tailed)WSR</b> | < 0.0001        | 0.0005             | < 0.0001                                 | < 0.0001                              |

**Supplementary table 4: ANOVA analysis for the parameters used to detect the efficacy of amukkara choornam in *invivo* studies**

| Parameters                         | Uncorrected Fisher's LSD |              |              | ANNOVA Statistics |                |              |
|------------------------------------|--------------------------|--------------|--------------|-------------------|----------------|--------------|
|                                    | G2 vs. G1                | G2 vs. G3    | G2 vs. G4    | Overall P value   | R square value | F statistics |
| Mean wt. of Male                   | 0.0005***                | 0.001**      | 0.0443*      | 0.0019**          | 0.2473         | 5.694        |
| Mean wt. of Female                 | < 0.0001****             | 0.0002***    | 0.0002***    | 0.0001***         | 0.3079         | 8.305        |
| Mean temp of Male                  | < 0.0001****             | < 0.0001**** | 0.0005***    | < 0.0001****      | 0.4826         | 16.16        |
| Mean temp of Female                | 0.0006***                | 0.0001***    | 0.0014**     | 0.0006***         | 0.2647         | 6.721        |
| Mean size of right limbs in Male   | < 0.0001****             | < 0.0001**** | < 0.0001**** | < 0.0001****      | 0.4864         | 16.41        |
| Mean size of right limbs in Female | < 0.0001****             | < 0.0001**** | 0.0001****   | 0.0001****        | 0.5022         | 18.84        |
| Mean size of left limbs in Male    | < 0.0001****             | < 0.0001**** | < 0.0001**** | < 0.0001****      | 0.5278         | 19.38        |
| Mean size of left limbs in Female  | < 0.0001****             | < 0.0001**** | < 0.0001**** | < 0.0001****      | 0.546          | 22.45        |
