# Supplementary figures and images for: In Vivo Evaluation of Withania somnifera–Based Indian Traditional Formulation (Amukkara Choornam), Against Chikungunya Virus–Induced Morbidity and Arthralgia
Source: PubMed Central journal article supplement — J Evid Based Integr Med. 2018 Feb 27;23:2156587218757661. doi: 10.1177/2156587218757661 (PMC5871050; doi:10.1177/2156587218757661), 2018-02-27

### Cell Cytotoxicity upon AMC treatment

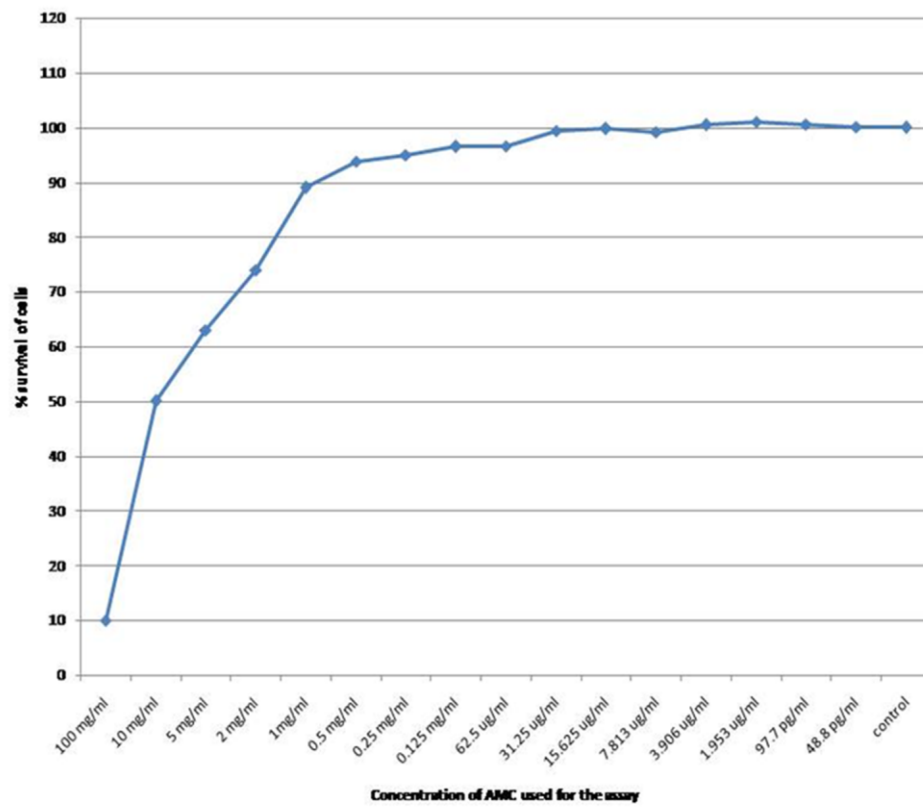

Supplement: supp.fig_1.pdf [file supp.fig_1.pdf]

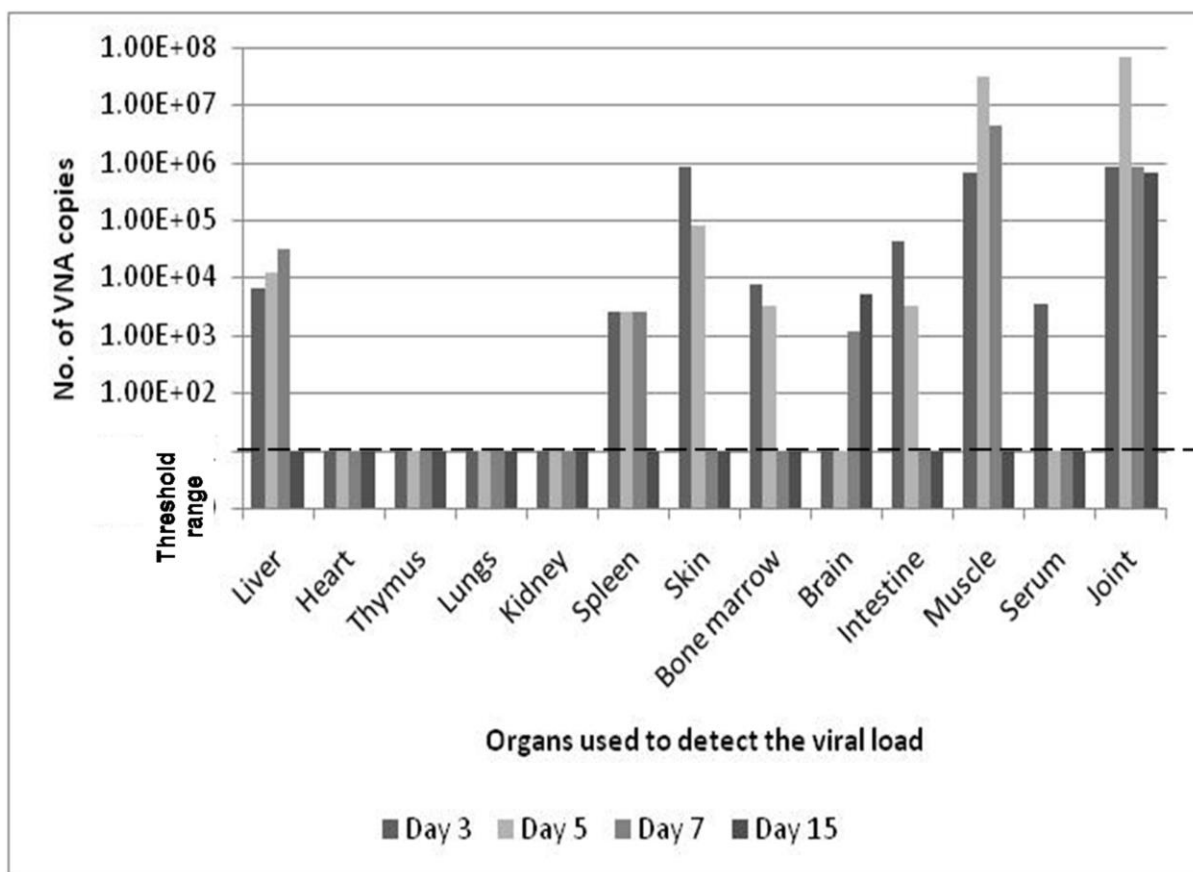

Supplement: supp.fig_2.pdf [file supp.fig_2.pdf]
